# Supplementary material
Source: publisher site journal article supplement (https://www.dovepress.com/article/257587)
Supplement: Supplementary file 1 [file get_supplementary_file.php]

**Supplemental Table S1. Reports of PCP in renal transplant recipients.**

| Reference no. | Authors           | Year | No. of renal transplant recipients | No. of PCP patients* | Sample types            | Detection methods                    |
|---------------|-------------------|------|------------------------------------|----------------------|-------------------------|--------------------------------------|
| 18            | Zhang et al.      | 2019 | 1                                  | 1                    | BALF                    | Wright-Giemsa staining and mNGS      |
| 23            | Sophie et al.     | 2019 | 1                                  | 1                    | BALF                    | n/a                                  |
| 24            | Aghilès et al.    | 2019 | 2483                               | 49                   | BALF and Oral washes    | qPCR, Giemsa, TBO and IF             |
| 25            | Eun et al.        | 2019 | 1502                               | 68                   | Sputum and BALF         | PCR and IF                           |
| 26            | Pan et al.        | 2019 | 1                                  | 1                    | Sputum                  | PCR                                  |
| 27            | Szydłowiec et al. | 2019 | 72                                 | 1                    | Sputum                  | nPCR and IF                          |
| 28            | Taylor et al.     | 2019 | 1                                  | 1                    | Lung biopsy             | GMS and PCR                          |
| 29            | Mascia et al.     | 2019 | 1                                  | 1                    | BALF                    | n/a                                  |
| 30            | Prasad et al.     | 2018 | 1                                  | 1                    | BALF                    | GMS                                  |
| 31            | Lee et al.        | 2018 | 1                                  | 1                    | BALF                    | Periodic Schiff-Methenamine staining |
| 32            | Kono et al.       | 2018 | 1                                  | 1                    | Sputum                  | PCR                                  |
| 33            | Nieto-Ríos et al. | 2018 | 2                                  | 2                    | Lung biopsy and BAL     | GMS and PCR                          |
| 34            | Ling et al.       | 2017 | 4                                  | 4                    | Induced sputum and BALF | PCR                                  |
| 35            | Goto et al.       | 2017 | 48                                 | 48                   | BALF                    | Staining and PCR                     |
| 36            | Brakemeier et al. | 2016 | 1368                               | 23                   | BALF                    | GMS, IF and PCR                      |

|    |                     |      |     |    |                         |                                                                |
|----|---------------------|------|-----|----|-------------------------|----------------------------------------------------------------|
| 37 | Macken et al.       | 2015 | 1   | 1  | BALF                    | PCR and IF                                                     |
| 38 | Gits-Muselli et al. | 2015 | 14  | 14 | BALF and Induced sputum | qPCR                                                           |
| 39 | Materkowska et al.  | 2014 | 1   | 1  | BALF                    | PCR                                                            |
| 40 | Chandola et al.     | 2014 | 7   | 7  | Induced sputum          | GMS                                                            |
| 41 | Ramalho et al.      | 2014 | 1   | 1  | Lung biopsy and BALF    | PCR, TBO, GMS, Ziehl-Neelsen staining and immunohistochemistry |
| 42 | Tu et al.           | 2013 | 3   | 3  | BALF                    | GMS                                                            |
| 43 | Borstnar et al.     | 2013 | 601 | 13 | BALF                    | qPCR and IF                                                    |
| 44 | Wu et al.           | 2013 | 1   | 1  | BALF                    | GMS                                                            |
| 45 | Muhammad et al.     | 2012 | 1   | 1  | BALF                    | IF                                                             |
| 46 | Phipps et al.       | 2011 | 14  | 11 | Induced sputum and BAL  | GMS and qPCR                                                   |
| 47 | Castro et al.       | 2010 | 750 | 11 | Induced sputum and BALF | Giemsa staining, IF and PCR                                    |
| 48 | Camara et al.       | 2010 | 1   | 1  | BALF                    | PCR, IF and May-Grümwald-Giemsa                                |
| 49 | Gianella et al.     | 2010 | 20  | 20 | BALF and sputum         | PCR, IF and TBO                                                |
| 50 | Shelton et al.      | 2009 | 2   | 2  | BALF                    | PCR and TBO                                                    |
| 51 | Yazaki et al.       | 2009 | 33  | 33 | BALF                    | GMS                                                            |
| 52 | Arichi et al.       | 2009 | 441 | 10 | Respiratory samples     | PCR                                                            |
| 53 | Kumar et al.        | 2009 | 1   | 1  | BALF                    | IF                                                             |
| 54 | Li et al.           | 2009 | 1   | 1  | Lung biopsy             | GMS                                                            |

|    |                  |      |      |    |                      |                            |
|----|------------------|------|------|----|----------------------|----------------------------|
| 55 | Boothpur et al.  | 2008 | 1    | 1  | Lung biopsy and BALF | GMS                        |
| 56 | Aguirre et al.   | 2007 | 1    | 1  | BALF                 | TBO and PCR                |
| 57 | Boer et al.      | 2007 | 26   | 22 | BALF                 | qPCR and GMS               |
| 58 | Verma et al.     | 2006 | 1    | 1  | Lung biopsy          | IF                         |
| 59 | Hung et al.      | 2006 | 1    | 1  | Lung biopsy          | GMS                        |
| 60 | Totet et al.     | 2005 | 1    | 1  | BALF                 | IF and Giemsa staining     |
| 61 | Höcker et al.    | 2005 | 3    | 3  | BALF                 | IF and PCR                 |
| 62 | Morosi et al.    | 2004 | 1    | 1  | BALF                 | IF                         |
| 63 | Radisic et al.   | 2003 | 240  | 17 | BALF and lung biopsy | GMS and IF                 |
| 64 | Chen et al.      | 2002 | 1    | 1  | BALF                 | GMS                        |
| 65 | Lufft et al.     | 1996 | 1192 | 10 | BALF                 | IF and Diff-Quick staining |
| 66 | Hennequin et al. | 1995 | 7    | 7  | BALF                 | Giemsa and GMS             |
| 67 | Chave et al.     | 1991 | 244  | 5  | BALF                 | GMS                        |

\*No. of confirmed PCP patients following renal transplantation.

**Abbreviations:** PCR, polymerase chain reaction (regular single round); qPCR, quantitative PCR; nPCR, nested PCR; GMS, Grocott's or Gomori's methenamine silver staining; TBO, toluidine blue O staining; IF, direct or indirect immunofluorescence staining; BALF, bronchoalveolar lavage fluid; mNGS, metagenomics next-generation sequencing; n/a, data not available.

**Supplemental Table S2. Microorganisms detected by mNGS.**

| <b>Genus</b>          | <b>No. of reads*</b> | <b>Species</b>                        | <b>No. of reads*</b> |
|-----------------------|----------------------|---------------------------------------|----------------------|
| <i>Pneumocystis</i>   | 1,665,693            | <i>Pneumocystis jirovecii</i>         | 1,665,693            |
| <i>Granulicatella</i> | 1,445                | <i>Granulicatella elegans</i>         | 1,406                |
|                       |                      | <i>Granulicatella adiacens</i>        | 7                    |
| <i>Streptococcus</i>  | 8,863                | <i>Streptococcus mitis</i>            | 1,079                |
|                       |                      | <i>Streptococcus pseudopneumoniae</i> | 580                  |
| <i>Lactococcus</i>    | 215                  | <i>Lactococcus lactis</i>             | 212                  |
| <i>Leuconostoc</i>    | 53                   | <i>Leuconostoc citreum</i>            | 40                   |
|                       |                      | <i>Leuconostoc lactis</i>             | 5                    |
| <i>Treponema</i>      | 38                   | <i>Treponema denticola</i>            | 33                   |
| <i>Campylobacter</i>  | 45                   | <i>Campylobacter rectus</i>           | 16                   |
|                       |                      | <i>Campylobacter concisus</i>         | 8                    |
| Anellovirus           | 12                   | <i>Torque teno virus</i>              | 12                   |

\* One BALF sample was directly sequenced after extracting total genomic DNA (without any depletion or enrichment procedure). NGS sequencing of a single-read SE50 library (50 ng input DNA) yielded a total of 24,165,934 reads (50 bp each). Raw reads were filtered out for ambiguous bases, low-quality ( $\leq$  Q20) bases or adapter contamination. Reads for human DNA were removed by aligning to the human reference genome assembly GRCh38.p13 (GenBank accession number GCF\_000001405.39). The remaining reads (1,676,364) were searched against an in-house microbial and parasitic genome database of BGI, consisting of 3,446 bacterial species (including 104 mycobacterial species and 45 mycoplasma and chlamydial species), 1,515 viral species, 206 fungal species (including the *P. jirovecii* RU7 genome assembly with GenBank assembly accession: GCA\_001477535.1), and 140 parasitic species. Reads for some genera could not be reliably assigned at the species level.

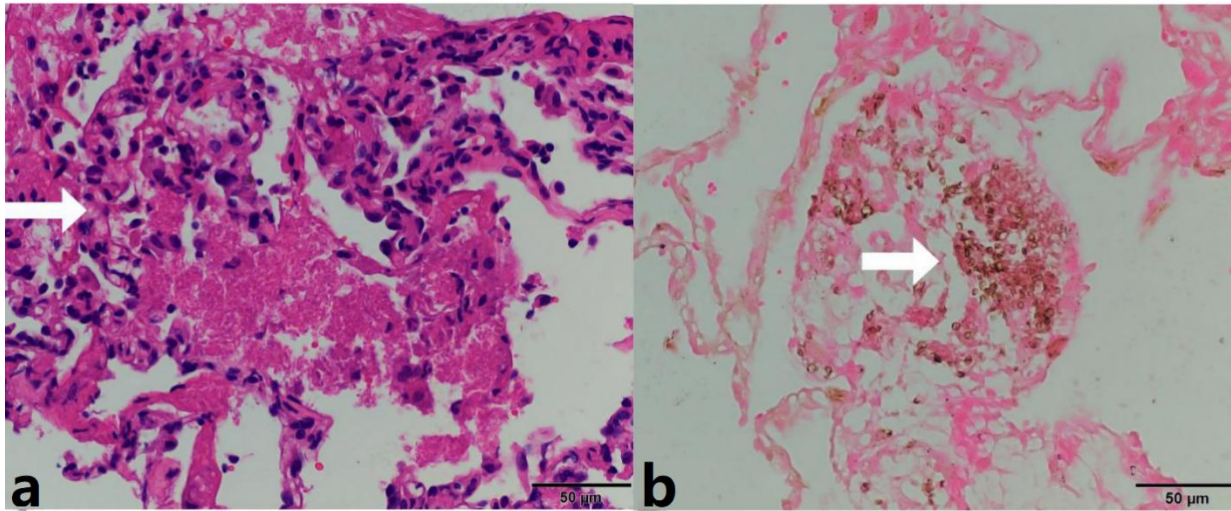

**Supplemental Figure S1. Pathological examination of lung biopsy specimens.** (a) Hematoxylin-eosin staining of a lung tissue section, showing the presence of abundant foamy or granular eosinophilic exudates as well as a few lymphocytes infiltrates (white arrow) in alveolar spaces. The alveolar septa became thickened due to edema and dilated capillaries. (b) Gomori methenamine-silver staining of a lung tissue section, showing the presence of a plenty of dark brown oval or cup-shaped organisms in alveolar spaces, consistent with the morphology of *P. jirovecii* (white arrow). Scale bar represents 50 μM.
